# Supplementary material
Source: PubMed Central journal article supplement (PMC6556109)
Supplement: NIHMS1014249-supplement-Table_S1.pdf [file NIHMS1014249-supplement-Table_S1.pdf]

Supplementary information S1 (table) | **Main cell elongation and division proteins**

| Process    | <i>E. coli</i>            | <i>B. subtilis</i>    | Mycobacteria         | Function                   |
|------------|---------------------------|-----------------------|----------------------|----------------------------|
| Elongation | PBP1a <sup>18</sup>       | PBP1 (REF. 129)       | PonA1 (REF. 29)      | Peptidoglycan synthase     |
|            | PBP1b? <sup>18</sup>      |                       | PonA2?               | Peptidoglycan synthase     |
|            | PBP2 (REF. 18)            | PBP2a <sup>126</sup>  |                      | Peptidoglycan synthase     |
|            |                           | PbpH <sup>126</sup>   |                      | Peptidoglycan synthase     |
|            |                           |                       | LdtAB? <sup>32</sup> | Peptidoglycan synthase     |
|            | Spr <sup>127</sup>        |                       |                      | Peptidoglycan hydrolase    |
|            | YdhO <sup>127</sup>       |                       |                      | Peptidoglycan hydrolase    |
|            | YebA <sup>127</sup>       |                       |                      | Peptidoglycan hydrolase    |
|            |                           | CwlO <sup>128</sup>   |                      | Peptidoglycan hydrolase    |
|            |                           | LytE <sup>128</sup>   |                      | Peptidoglycan hydrolase    |
|            | MreBCD <sup>18</sup>      | MreBCD <sup>130</sup> |                      | Guides elongation complex  |
|            |                           | MreBH <sup>130</sup>  |                      | Guides elongation complex  |
|            |                           | Mbl <sup>130</sup>    |                      | Guides elongation complex  |
|            |                           |                       | Wag31 (REF. 24)      | Anchors elongation complex |
| Division   |                           |                       | CwsA <sup>26</sup>   | Structural protein         |
|            | PBP1b <sup>18</sup>       | PBP1 (REF. 126)       | PonA1 (REF. 29)      | Peptidoglycan synthase     |
|            | PBP1a? <sup>18</sup>      |                       |                      | Peptidoglycan synthase     |
|            | PBP3 (REF. 18)            | PBP2b <sup>126</sup>  | PBBP <sup>42</sup>   | Peptidoglycan synthase     |
|            |                           |                       | PBPA <sup>31</sup>   | Peptidoglycan synthase     |
|            | AmiABC <sup>18</sup>      | LytC <sup>133</sup>   |                      | Peptidoglycan hydrolase    |
|            |                           | LytD <sup>133</sup>   |                      | Peptidoglycan hydrolase    |
|            |                           | LytF <sup>133</sup>   | RipA <sup>47</sup>   | Peptidoglycan hydrolase    |
|            |                           |                       | RpfB <sup>48</sup>   | Peptidoglycan hydrolase    |
|            | ZipA <sup>18</sup>        |                       |                      | Z ring stabilization       |
|            | ZapABCD <sup>18,135</sup> | ZapA <sup>35</sup>    |                      | Z ring stabilization       |
|            | FtsA <sup>18</sup>        | FtsA <sup>35</sup>    | FhaB <sup>41</sup>   | Z ring stabilization       |
|            | FtsP <sup>134</sup>       |                       |                      | Z ring stabilization       |
|            |                           | SepF <sup>35</sup>    |                      | Z ring stabilization       |
|            | FtsQLB <sup>18</sup>      | DivIBC <sup>132</sup> | FtsQ <sup>23</sup>   | Structural protein         |
|            | FtsW <sup>18</sup>        | FtsW <sup>35</sup>    | FtsW <sup>23</sup>   | Structural protein         |
|            | FtsZ <sup>18</sup>        | FtsZ <sup>35</sup>    | FtsZ <sup>23</sup>   | Forms the Z ring           |
|            | FtsN <sup>18</sup>        |                       |                      | Structural protein         |
|            |                           | CrgA <sup>43</sup>    | Structural protein   |                            |
|            |                           | CwsA <sup>26</sup>    | Structural protein   |                            |

All references are numbered according to main article with the exception of one additional reference (number 135).

135. Durand-Heredia, J., Rivkin, E., Fan, G., Morales, J. & Janakiraman, A. Identification of ZapD as a cell division factor that promotes the assembly of FtsZ in *Escherichia coli*. *J. Bacteriol.* **194**, 3189–3198 (2012).
